# Supplementary material for: Overexpression of DIO1 is related to poor prognosis through regulating EMT and TAM infiltration in gastric carcinoma
Source: Research Square preprint supplement (doi:10.21203/rs.3.rs-7563912/v1), 2025-09-22
Supplement: Supplementary file 1 [file 11e5e3497c59ea08bf239489.docx]

**SUPPORTING INFORMATION**

**Additional supporting information can be found online in the Supporting Information section at the end of this article.**

**Contents**

**Doc. S1 Supplementary Methods**

**Table S1. Primers used in this study for RT-PCR assays**

**Table S2. List of antibodies used in the study**
